# Supplementary material for: Study on the Adsorption and Activation Behaviours of Carbon Dioxide over Copper Cluster (Cu4) and Alumina-Supported Copper Catalyst (Cu4/Al2O3) by means of Density Functional Theory
Source: Hindawi journal article supplement (doi:10.1155/2019/4341056), 2019-12-30
Supplement: f1 [file 4341056.f1.docx]

1. **Al2O3**

90

O 6.498855 4.030825 0.000000

O 1.749022 3.835802 1.770273

O 0.758546 1.651421 0.989783

O 4.256799 3.107675 0.989783

O 5.247275 0.923294 1.770273

O 3.000812 0.728127 0.000000

Al 4.688125 0.000000 0.260275

Al 2.569276 2.379500 0.729508

Al 6.067319 2.379500 0.729508

Al 1.190082 0.000000 0.260275

O 13.495362 4.030825 0.000000

O 8.745528 3.835802 1.770273

O 7.754843 1.651421 0.989783

O 11.253096 3.107675 0.989783

O 12.243572 0.923294 1.770273

O 9.997108 0.728127 0.000000

Al 11.684632 0.000000 0.260275

Al 9.565572 2.379500 0.729508

Al 13.063826 2.379500 0.729508

Al 8.186379 0.000000 0.260275

O 20.491658 4.030825 0.000000

O 15.741825 3.835802 1.770273

O 14.751349 1.651421 0.989783

O 18.249393 3.107675 0.989783

O 19.240078 0.923294 1.770273

O 16.993405 0.728127 0.000000

Al 18.680929 0.000000 0.260275

Al 16.561869 2.379500 0.729508

Al 20.060122 2.379500 0.729508

Al 15.182675 0.000000 0.260275

O 6.498855 8.789921 0.000000

O 1.749022 8.594754 1.770273

O 0.758546 6.410373 0.989783

O 4.256799 7.866627 0.989783

O 5.247275 5.682246 1.770273

O 3.000812 5.487079 0.000000

Al 4.688125 4.759000 0.260275

Al 2.569276 7.138500 0.729508

Al 6.067319 7.138500 0.729508

Al 1.190082 4.759000 0.260275

O 13.495362 8.789921 0.000000

O 8.745528 8.594754 1.770273

O 7.754843 6.410373 0.989783

O 11.253096 7.866627 0.989783

O 12.243572 5.682246 1.770273

O 9.997108 5.487079 0.000000

Al 11.684632 4.759000 0.260275

Al 9.565572 7.138500 0.729508

Al 13.063826 7.138500 0.729508

Al 8.186379 4.759000 0.260275

O 20.491658 8.789921 0.000000

O 15.741825 8.594754 1.770273

O 14.751349 6.410373 0.989783

O 18.249393 7.866627 0.989783

O 19.240078 5.682246 1.770273

O 16.993405 5.487079 0.000000

Al 18.680929 4.759000 0.260275

Al 16.561869 7.138500 0.729508

Al 20.060122 7.138500 0.729508

Al 15.182675 4.759000 0.260275

O 6.498855 13.548873 0.000000

O 1.749022 13.353706 1.770273

O 0.758546 11.169325 0.989783

O 4.256799 12.625579 0.989783

O 5.247275 10.441198 1.770273

O 3.000812 10.246175 0.000000

Al 4.688125 9.518000 0.260275

Al 2.569276 11.897500 0.729508

Al 6.067319 11.897500 0.729508

Al 1.190082 9.518000 0.260275

O 13.495362 13.548873 0.000000

O 8.745528 13.353706 1.770273

O 7.754843 11.169325 0.989783

O 11.253096 12.625579 0.989783

O 12.243572 10.441198 1.770273

O 9.997108 10.246175 0.000000

Al 11.684632 9.518000 0.260275

Al 9.565572 11.897500 0.729508

Al 13.063826 11.897500 0.729508

Al 8.186379 9.518000 0.260275

O 20.491658 13.548873 0.000000

O 15.741825 13.353706 1.770273

O 14.751349 11.169325 0.989783

O 18.249393 12.625579 0.989783

O 19.240078 10.441198 1.770273

O 16.993405 10.246175 0.000000

Al 18.680929 9.518000 0.260275

Al 16.561869 11.897500 0.729508

Al 20.060122 11.897500 0.729508

Al 15.182675 9.518000 0.260275

1. CO2-Al2O3

93

O 6.498855 4.030825 0.000000

O 1.749022 3.835802 1.770273

O 0.758546 1.651421 0.989783

O 4.256799 3.107675 0.989783

O 5.247275 0.923294 1.770273

O 3.000812 0.728127 0.000000

Al 4.688125 0.000000 0.260275

Al 2.569276 2.379500 0.729508

Al 6.067319 2.379500 0.729508

Al 1.190082 0.000000 0.260275

O 13.495362 4.030825 0.000000

O 8.745528 3.835802 1.770273

O 7.754843 1.651421 0.989783

O 11.253096 3.107675 0.989783

O 12.243572 0.923294 1.770273

O 9.997108 0.728127 0.000000

Al 11.684632 0.000000 0.260275

Al 9.565572 2.379500 0.729508

Al 13.063826 2.379500 0.729508

Al 8.186379 0.000000 0.260275

O 20.491658 4.030825 0.000000

O 15.741825 3.835802 1.770273

O 14.751349 1.651421 0.989783

O 18.249393 3.107675 0.989783

O 19.240078 0.923294 1.770273

O 16.993405 0.728127 0.000000

Al 18.680929 0.000000 0.260275

Al 16.561869 2.379500 0.729508

Al 20.060122 2.379500 0.729508

Al 15.182675 0.000000 0.260275

O 6.498855 8.789921 0.000000

O 1.749022 8.594754 1.770273

O 0.758546 6.410373 0.989783

O 4.256799 7.866627 0.989783

O 5.247275 5.682246 1.770273

O 3.000812 5.487079 0.000000

Al 4.688125 4.759000 0.260275

Al 2.569276 7.138500 0.729508

Al 6.067319 7.138500 0.729508

Al 1.190082 4.759000 0.260275

O 13.495362 8.789921 0.000000

O 8.745528 8.594754 1.770273

O 7.754843 6.410373 0.989783

O 11.253096 7.866627 0.989783

O 12.243572 5.682246 1.770273

O 9.997108 5.487079 0.000000

Al 11.684632 4.759000 0.260275

Al 9.565572 7.138500 0.729508

Al 13.063826 7.138500 0.729508

Al 8.186379 4.759000 0.260275

O 20.491658 8.789921 0.000000

O 15.741825 8.594754 1.770273

O 14.751349 6.410373 0.989783

O 18.249393 7.866627 0.989783

O 19.240078 5.682246 1.770273

O 16.993405 5.487079 0.000000

Al 18.680929 4.759000 0.260275

Al 16.561869 7.138500 0.729508

Al 20.060122 7.138500 0.729508

Al 15.182675 4.759000 0.260275

O 6.498855 13.548873 0.000000

O 1.749022 13.353706 1.770273

O 0.758546 11.169325 0.989783

O 4.256799 12.625579 0.989783

O 5.247275 10.441198 1.770273

O 3.000812 10.246175 0.000000

Al 4.688125 9.518000 0.260275

Al 2.569276 11.897500 0.729508

Al 6.067319 11.897500 0.729508

Al 1.190082 9.518000 0.260275

O 13.495362 13.548873 0.000000

O 8.745528 13.353706 1.770273

O 7.754843 11.169325 0.989783

O 11.253096 12.625579 0.989783

O 12.243572 10.441198 1.770273

O 9.997108 10.246175 0.000000

Al 11.684632 9.518000 0.260275

Al 9.565572 11.897500 0.729508

Al 13.063826 11.897500 0.729508

Al 8.186379 9.518000 0.260275

O 20.491658 13.548873 0.000000

O 15.741825 13.353706 1.770273

O 14.751349 11.169325 0.989783

O 18.249393 12.625579 0.989783

O 19.240078 10.441198 1.770273

O 16.993405 10.246175 0.000000

Al 18.680929 9.518000 0.260275

Al 16.561869 11.897500 0.729508

Al 20.060122 11.897500 0.729508

Al 15.182675 9.518000 0.260275

C 12.271284 7.724063 3.470367

O 13.230580 7.970384 2.807733

O 11.345292 7.509363 4.150512

1. **CO2-Cu4-Al2O3-d2 config**

97

O 6.498855 4.030825 0.000000

O 1.749022 3.835802 1.770273

O 0.758546 1.651421 0.989783

O 4.256799 3.107675 0.989783

O 5.247275 0.923294 1.770273

O 3.000812 0.728127 0.000000

Al 4.688125 0.000000 0.260275

Al 2.569276 2.379500 0.729508

Al 6.067319 2.379500 0.729508

Al 1.190082 0.000000 0.260275

O 13.495362 4.030825 0.000000

O 8.745528 3.835802 1.770273

O 7.754843 1.651421 0.989783

O 11.253096 3.107675 0.989783

O 12.243572 0.923294 1.770273

O 9.997108 0.728127 0.000000

Al 11.684632 0.000000 0.260275

Al 9.565572 2.379500 0.729508

Al 13.063826 2.379500 0.729508

Al 8.186379 0.000000 0.260275

O 20.491658 4.030825 0.000000

O 15.741825 3.835802 1.770273

O 14.751349 1.651421 0.989783

O 18.249393 3.107675 0.989783

O 19.240078 0.923294 1.770273

O 16.993405 0.728127 0.000000

Al 18.680929 0.000000 0.260275

Al 16.561869 2.379500 0.729508

Al 20.060122 2.379500 0.729508

Al 15.182675 0.000000 0.260275

O 6.498855 8.789921 0.000000

O 1.749022 8.594754 1.770273

O 0.758546 6.410373 0.989783

O 4.256799 7.866627 0.989783

O 5.247275 5.682246 1.770273

O 3.000812 5.487079 0.000000

Al 4.688125 4.759000 0.260275

Al 2.569276 7.138500 0.729508

Al 6.067319 7.138500 0.729508

Al 1.190082 4.759000 0.260275

O 13.495362 8.789921 0.000000

O 8.745528 8.594754 1.770273

O 7.754843 6.410373 0.989783

O 11.253096 7.866627 0.989783

O 12.243572 5.682246 1.770273

O 9.997108 5.487079 0.000000

Al 11.684632 4.759000 0.260275

Al 9.565572 7.138500 0.729508

Al 13.063826 7.138500 0.729508

Al 8.186379 4.759000 0.260275

O 20.491658 8.789921 0.000000

O 15.741825 8.594754 1.770273

O 14.751349 6.410373 0.989783

O 18.249393 7.866627 0.989783

O 19.240078 5.682246 1.770273

O 16.993405 5.487079 0.000000

Al 18.680929 4.759000 0.260275

Al 16.561869 7.138500 0.729508

Al 20.060122 7.138500 0.729508

Al 15.182675 4.759000 0.260275

O 6.498855 13.548873 0.000000

O 1.749022 13.353706 1.770273

O 0.758546 11.169325 0.989783

O 4.256799 12.625579 0.989783

O 5.247275 10.441198 1.770273

O 3.000812 10.246175 0.000000

Al 4.688125 9.518000 0.260275

Al 2.569276 11.897500 0.729508

Al 6.067319 11.897500 0.729508

Al 1.190082 9.518000 0.260275

O 13.495362 13.548873 0.000000

O 8.745528 13.353706 1.770273

O 7.754843 11.169325 0.989783

O 11.253096 12.625579 0.989783

O 12.243572 10.441198 1.770273

O 9.997108 10.246175 0.000000

Al 11.684632 9.518000 0.260275

Al 9.565572 11.897500 0.729508

Al 13.063826 11.897500 0.729508

Al 8.186379 9.518000 0.260275

O 20.491658 13.548873 0.000000

O 15.741825 13.353706 1.770273

O 14.751349 11.169325 0.989783

O 18.249393 12.625579 0.989783

O 19.240078 10.441198 1.770273

O 16.993405 10.246175 0.000000

Al 18.680929 9.518000 0.260275

Al 16.561869 11.897500 0.729508

Al 20.060122 11.897500 0.729508

Al 15.182675 9.518000 0.260275

Cu 10.917976 5.692845 3.127347

Cu 9.948784 7.933954 3.135820

Cu 9.560986 6.459489 4.871960

Cu 8.541631 5.547365 2.886686

C 7.520866 6.090398 5.119041

O 7.835193 6.536173 6.208312

O 6.798996 5.621020 4.275704

1. **CO2- Cu4-d2**

7

Cu 16.017932 7.542770 12.759525

Cu 16.540329 9.893521 12.896100

Cu 14.581310 8.997922 14.052112

Cu 14.714162 9.114704 11.597196

O 12.438103 10.591355 14.170100

C 13.102430 10.071540 13.289901

O 13.053992 10.059236 12.011096

1. **Cu4-Al2O3**

94

O 6.498855 4.030825 0.000000

O 1.749022 3.835802 1.770273

O 0.758546 1.651421 0.989783

O 4.256799 3.107675 0.989783

O 5.247275 0.923294 1.770273

O 3.000812 0.728127 0.000000

Al 4.688125 0.000000 0.260275

Al 2.569276 2.379500 0.729508

Al 6.067319 2.379500 0.729508

Al 1.190082 0.000000 0.260275

O 13.495362 4.030825 0.000000

O 8.745528 3.835802 1.770273

O 7.754843 1.651421 0.989783

O 11.253096 3.107675 0.989783

O 12.243572 0.923294 1.770273

O 9.997108 0.728127 0.000000

Al 11.684632 0.000000 0.260275

Al 9.565572 2.379500 0.729508

Al 13.063826 2.379500 0.729508

Al 8.186379 0.000000 0.260275

O 20.491658 4.030825 0.000000

O 15.741825 3.835802 1.770273

O 14.751349 1.651421 0.989783

O 18.249393 3.107675 0.989783

O 19.240078 0.923294 1.770273

O 16.993405 0.728127 0.000000

Al 18.680929 0.000000 0.260275

Al 16.561869 2.379500 0.729508

Al 20.060122 2.379500 0.729508

Al 15.182675 0.000000 0.260275

O 6.498855 8.789921 0.000000

O 1.749022 8.594754 1.770273

O 0.758546 6.410373 0.989783

O 4.256799 7.866627 0.989783

O 5.247275 5.682246 1.770273

O 3.000812 5.487079 0.000000

Al 4.688125 4.759000 0.260275

Al 2.569276 7.138500 0.729508

Al 6.067319 7.138500 0.729508

Al 1.190082 4.759000 0.260275

O 13.495362 8.789921 0.000000

O 8.745528 8.594754 1.770273

O 7.754843 6.410373 0.989783

O 11.253096 7.866627 0.989783

O 12.243572 5.682246 1.770273

O 9.997108 5.487079 0.000000

Al 11.684632 4.759000 0.260275

Al 9.565572 7.138500 0.729508

Al 13.063826 7.138500 0.729508

Al 8.186379 4.759000 0.260275

O 20.491658 8.789921 0.000000

O 15.741825 8.594754 1.770273

O 14.751349 6.410373 0.989783

O 18.249393 7.866627 0.989783

O 19.240078 5.682246 1.770273

O 16.993405 5.487079 0.000000

Al 18.680929 4.759000 0.260275

Al 16.561869 7.138500 0.729508

Al 20.060122 7.138500 0.729508

Al 15.182675 4.759000 0.260275

O 6.498855 13.548873 0.000000

O 1.749022 13.353706 1.770273

O 0.758546 11.169325 0.989783

O 4.256799 12.625579 0.989783

O 5.247275 10.441198 1.770273

O 3.000812 10.246175 0.000000

Al 4.688125 9.518000 0.260275

Al 2.569276 11.897500 0.729508

Al 6.067319 11.897500 0.729508

Al 1.190082 9.518000 0.260275

O 13.495362 13.548873 0.000000

O 8.745528 13.353706 1.770273

O 7.754843 11.169325 0.989783

O 11.253096 12.625579 0.989783

O 12.243572 10.441198 1.770273

O 9.997108 10.246175 0.000000

Al 11.684632 9.518000 0.260275

Al 9.565572 11.897500 0.729508

Al 13.063826 11.897500 0.729508

Al 8.186379 9.518000 0.260275

O 20.491658 13.548873 0.000000

O 15.741825 13.353706 1.770273

O 14.751349 11.169325 0.989783

O 18.249393 12.625579 0.989783

O 19.240078 10.441198 1.770273

O 16.993405 10.246175 0.000000

Al 18.680929 9.518000 0.260275

Al 16.561869 11.897500 0.729508

Al 20.060122 11.897500 0.729508

Al 15.182675 9.518000 0.260275

Cu 10.917976 5.692845 3.127347

Cu 9.948784 7.933954 3.135820

Cu 9.560986 6.459489 4.871960

Cu 8.541631 5.547365 2.886686

1. **Cu4-rhombus**

4

Cu 13.151718 8.462357 8.883398

Cu 13.152164 9.614961 10.937807

Cu 13.151778 8.464465 12.992524

Cu 13.151434 7.311963 10.937983

1. **Cu4-tetrahedral**

4

Cu 16.004346 7.564324 12.887846

Cu 16.267687 10.023192 12.890709

Cu 14.458999 8.982494 13.951048

Cu 14.595546 8.982053 11.576125
